# Supplementary material
Source: PubMed Central journal article supplement (PMC5461115)
Supplement: NIHMS860942-supplement.pdf [file NIHMS860942-supplement.pdf]

## Supplement E-Appendix 1:

### **Nasal Brushing and Cell Isolation**

Subject's nasal epithelium was anesthetized with 1% tetracaine (Pontocaine; Sanofi Winthrop, New York, NY) by spraying 2 ml in each nostril with a mucosal atomization device (MAD) spray tip (Wolfe Tory Medical Inc., UT). In order to confine the tetracaine to the nasal passages, each subject took slow deep breaths through the mouth during application of the topical anesthetic. After waiting ten minutes for the tetracaine to exert its effect, each nasal passage was washed twice with 10 ml of warm sterile saline, a total of 40 ml. To collect cells, the nasal epithelium was brushed with a combined back and forth and rotating motion. The brush was a 115 cm disposable cytology brush, bristles extending 10 mm with a 5 mm diameter (Model BC-202D-5010, Olympus Medical Systems, Tokyo). The brush handle was cut to result in a working length of about 20 cm. The first brushing occurred along the lower medial margin of the inferior turbinate, and the second and third brushings each moved up the medial wall of the inferior turbinate. At the end of each brushing, the tissue samples were removed from the brush by manually flicking and shaking the brush in a centrifuge tube containing 10 ml of phosphate buffered saline (PBS) supplemented with penicillin ( $10^5$  U/l), streptomycin (100 mg/l), gentamicin (100 mg/l) and amphotericin B (2.5 mg/l); hereafter referred to as PBS with antibiotics. Both sides of the nose were brushed in this manner for a total of six samples.

1           The nasal tissue consisting primarily of small aggregates of nasal mucosa and  
2 mucus was rinsed three times in PBS with antibiotics containing 5 mM dithiothreitol to  
3 reduce mucus contamination. After a final rinse in PBS with antibiotics, the tissue was  
4 incubated at 4°C overnight in PBS with antibiotics containing 0.025% protease. The  
5 following day, the enzyme solution was neutralized with a 1:1 mixture of Dulbecco's  
6 modified Eagle's medium and Ham's F-12 (DF12) containing 5% fetal bovine serum  
7 (FBS) and antibiotics as described above. Any clumps of nasal airway epithelial cells  
8 remaining were dispersed by the addition of 0.05% trypsin, 0.02% EDTA in 0.9% Na<sup>+</sup>Cl<sup>-</sup>  
9 wt/v (saline-trypsin-versene; STV) and repeated agitation in a 10 ml pipette. After  
10 centrifugation of the cell suspension (100 x g), cell number and viability were  
11 determined using trypan blue and a hemacytometer.

12

### 13 **Conditional Reprogramming of Nasal Epithelial Cells and Production of** 14 **Differentiated Cell Cultures**

15           Isolated nasal cells are then conditionally reprogrammed according to published  
16 methods with some modifications.<sup>1;2</sup> 3T3-L1 fibroblasts (obtained from the Cell Culture  
17 Facility, University of California, San Francisco) were suspended in F-medium (3:1  
18 Ham's F-12:DMEM, supplemented with 5% FBS, 5µg/ml bovine insulin (Sigma-Aldrich),  
19 8.4 ng/ml cholera toxin (Sigma-Aldrich), 10 ng/ml recombinant human EGF (Atlanta  
20 Biologicals,), 250 ng/ml hydrocortisone (Sigma-Aldrich), 10µM Y27632-ROCK Inhibitor  
21 (Enzo Life Sciences), penicillin/streptomycin (as above), 250 µg/ml amphotericin B and  
22 10 µg/ml gentamicin) and irradiated in the Gammacell 3000 Elan (Best Theratronics,  
23 Springfield, VA) at 30 Gy. Irradiated cells were then plated ( $3 \times 10^6$  per 10 cm tissue

1 culture dish; Corning) and allowed to attach for 2 hours at 37°C.  $1.5 \times 10^6$  nasal cells  
2 were added to each dish and allowed to proliferate for 4 to 7 days (37°C, 5% CO<sub>2</sub>). The  
3 nasal cells were harvested when approximately 80% confluent by differential  
4 trypsinization. The plate was rinsed twice in PBS with antibiotics, and then treated with  
5 2 ml 0.05% STV for 4 minutes at 37°C to remove irradiated 3T3 fibroblasts. Following  
6 two PBS rinses, an additional 4 ml STV was added for 8 minutes at 37°C. The STV  
7 was neutralized in F medium, and cell number and viability were determined as above.  
8 Next, the conditionally reprogrammed cells were plated at  $2.5 \times 10^5$  viable cells/cm<sup>2</sup>  
9 onto tissue culture inserts (Costar Transwell) coated with human placental collagen (20  
10 µg/cm<sup>2</sup>; Sigma) in DF12 containing 5% FBS and antibiotics. After 24h, the inserts were  
11 rinsed with PBS with antibiotics and the fed from the basal side only with UNC-ALI  
12 media, serum-free media that supports growth and functional differentiation of tracheo-  
13 bronchial respiratory epithelial cell cultures.<sup>3</sup> Medium was changed three times a week  
14 by addition of approximately 1 ml to basal side of the insert. Cultures were grown for 28  
15 days to ensure full differentiation.

16

### 17 **Determination of CFTR-mediated Cl<sup>-</sup> currents in Ussing chambers**

18 For measurements of transepithelial Cl<sup>-</sup> current ( $I_{Cl}$ ), confluent nasal cultures  
19 were mounted into water-jacketed (37°C) EasyMount Ussing chambers (Physiologic  
20 Instruments, San Diego, CA), and used for electrophysiological studies, as described  
21 previously.<sup>4</sup> Transepithelial voltage ( $V_T$ ) was clamped to 0 mV. Short-circuit current ( $I_{Cl}$   
22 under the conditions of these experiments) were measured using a four-electrode  
23 voltage clamp (VCC MC6 multichannel voltage clamp, Physiologic Instruments), with

1 Ag-AgCl electrodes (World Precision Instruments, Sarasota, FL) connected to the  
2 solutions through agar bridges containing 1 M KCl.  $V_T$  was briefly clamped from 0 to 1  
3 mV and  $R_T$  was calculated from the corresponding current deflection using Ohm's law.  
4 Positive currents were defined as anion movements from serosa to mucosa. In the  
5 Ussing chambers, bicarbonate-buffered solutions (5 ml) recirculated on the apical and  
6 basolateral sides separately. A serosal-to-mucosal  $\text{Cl}^-$  gradient was used to increase  
7 the electrochemical driving force for  $\text{Cl}^-$  secretion. The basolateral solution contained (in  
8 mM) 120 NaCl, 25  $\text{NaHCO}_3$ , 5 KCl, 1.2  $\text{NaH}_2\text{PO}_4$ , 5.6 glucose, 2.5  $\text{CaCl}_2$ , and 1.2  
9  $\text{MgCl}_2$ . The mucosal  $\text{Cl}^-$ -free solution contained (in mM) 120  $\text{Na}^+$ -gluconate, 20  $\text{NaHCO}_3$   
10 5  $\text{KHCO}_3$ , 1.2  $\text{NaH}_2\text{PO}_4$ , 5.6 glucose, 2.5  $\text{Ca}^{++}$ (gluconate)<sub>2</sub>, and 1.2  $\text{MgSO}_4$ . All  
11 solutions were gassed with 5%  $\text{CO}_2$ -95% air, resulting in pH 7.4. Amiloride (100  $\mu\text{M}$ ;  
12 apical) was added mucosally to block  $\text{Na}^+$  absorption and forskolin (20  $\mu\text{M}$ ; serosal) was  
13 added with acute exposure of ivacaftor (1  $\mu\text{M}$ ; apical) to activate cAMP-dependent  
14 CFTR  $\text{Cl}^-$  transport. Patient-specific CFTR  $\text{Cl}^-$  currents were quantified with 50  $\mu\text{M}$   
15 CFTRinh172 (CF Foundation Therapeutics, Inc.). Ivacaftor was purchased from  
16 Selleckchem.com

## Supplement References

1. Palechor-Ceron N, Supryniewicz FA, Upadhyay G, Dakic A, Minas T, Simic V, Johnson M, Albanese C, Schlegel R, Liu X. 2013. Radiation induces diffusible feeder cell factor (s) that cooperate with rock inhibitor to conditionally reprogram and immortalize epithelial cells. *The American journal of pathology*. 183(6):1862-1870.
2. Liu X, Ory V, Chapman S, Yuan H, Albanese C, Kallakury B, Timofeeva OA, Nealon C, Dakic A, Simic V. 2012. Rock inhibitor and feeder cells induce the conditional reprogramming of epithelial cells. *The American journal of pathology*. 180(2):599-607.
3. Fulcher ML, Randell SH. 2013. Human nasal and tracheo-bronchial respiratory epithelial cell culture. *Epithelial cell culture protocols*. Springer. p. 109-121.
4. Illek B, Fu Z, Schwarzer C, Banzon T, Jalickee S, Miller SS, Machen TE. 2008. Flagellin-stimulated cl<sup>-</sup> secretion and innate immune responses in airway epithelia: Role for p38. *American Journal of Physiology-Lung Cellular and Molecular Physiology*. 295(4):L531-L542.
